# Supplementary material
Source: publisher figshare collection journal article supplement (https://sage.figshare.com/ndownloader/files/30778916)
Supplement: Supplementary file 1 [file 30778916]

Dear editor:

Thank you and the reviewers for your valuable suggestions. We have carefully read through the comments and made proper revisions. Our responses to the reviewer's questions are listed below. We greatly appreciate your time and efforts to improve our manuscript for publication.

Reviewer(s)' Comments to Author:

Reviewer: 1

Comments to the Author

This paper has a good application value in the field of robotics and agriculture. According to the opinions of reviewers, the authors have made sufficient revision to meet the publication requirement.

**Thank you.**

Reviewer: 4

Comments to the Author

The resubmitted manuscript has been revised as suggested. However, some minor revisions are still needed. The experimental platform described in Fig.9 is not detailed enough, such as the length of links, the diameter of upper/lower platform, etc., which are essential for a better understanding. In addition, the effectiveness of the manuscript is verified through comparing with the designed system without a leveling system. However, the comparisons between the designed auto-adaptive levelling hydraulic suspension and references 18, 21 were not provided, which makes it difficult to appreciate the contributions of the manuscript.

**Revised as suggested. The 2-dimensional structure schematic of the experimental platform is shown in Figure 8. The main geometric parameters are marked in this figure now. In this way, it is easier for readers to understand the experimental platform. In addition, the comparisons between the designed auto-adaptive levelling hydraulic suspension and References 18, 21 are added in the Section 5. Thank you.**

Reviewer: 5

Comments to the Author

The author presents arguments and makes the comments of the reviewers.

**Thank you.**

Associate Editor(s)' Comments to Author:

Associate Editor: Copot, Cosmin

Comments to the Author:

(There are no comments.)
